# Supplementary material
Source: MDPI journal article supplement (https://www.mdpi.com/2227-9717/11/3/917)
Supplement: s1 [file s1]

Archive with 5 entries (5 files):
- fig S1.png
- fig S2.jpg
- fig S3.tif
- fig S4.tif
- processes-2260614 supplementary material, proof.pdf
