# Supplementary material
Source: MDPI journal article supplement (https://www.mdpi.com/2227-9717/11/3/917)

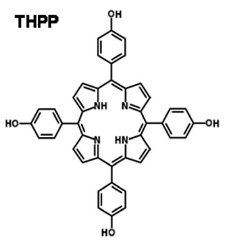

Supplement: s1 [file s1 › fig S1.png]

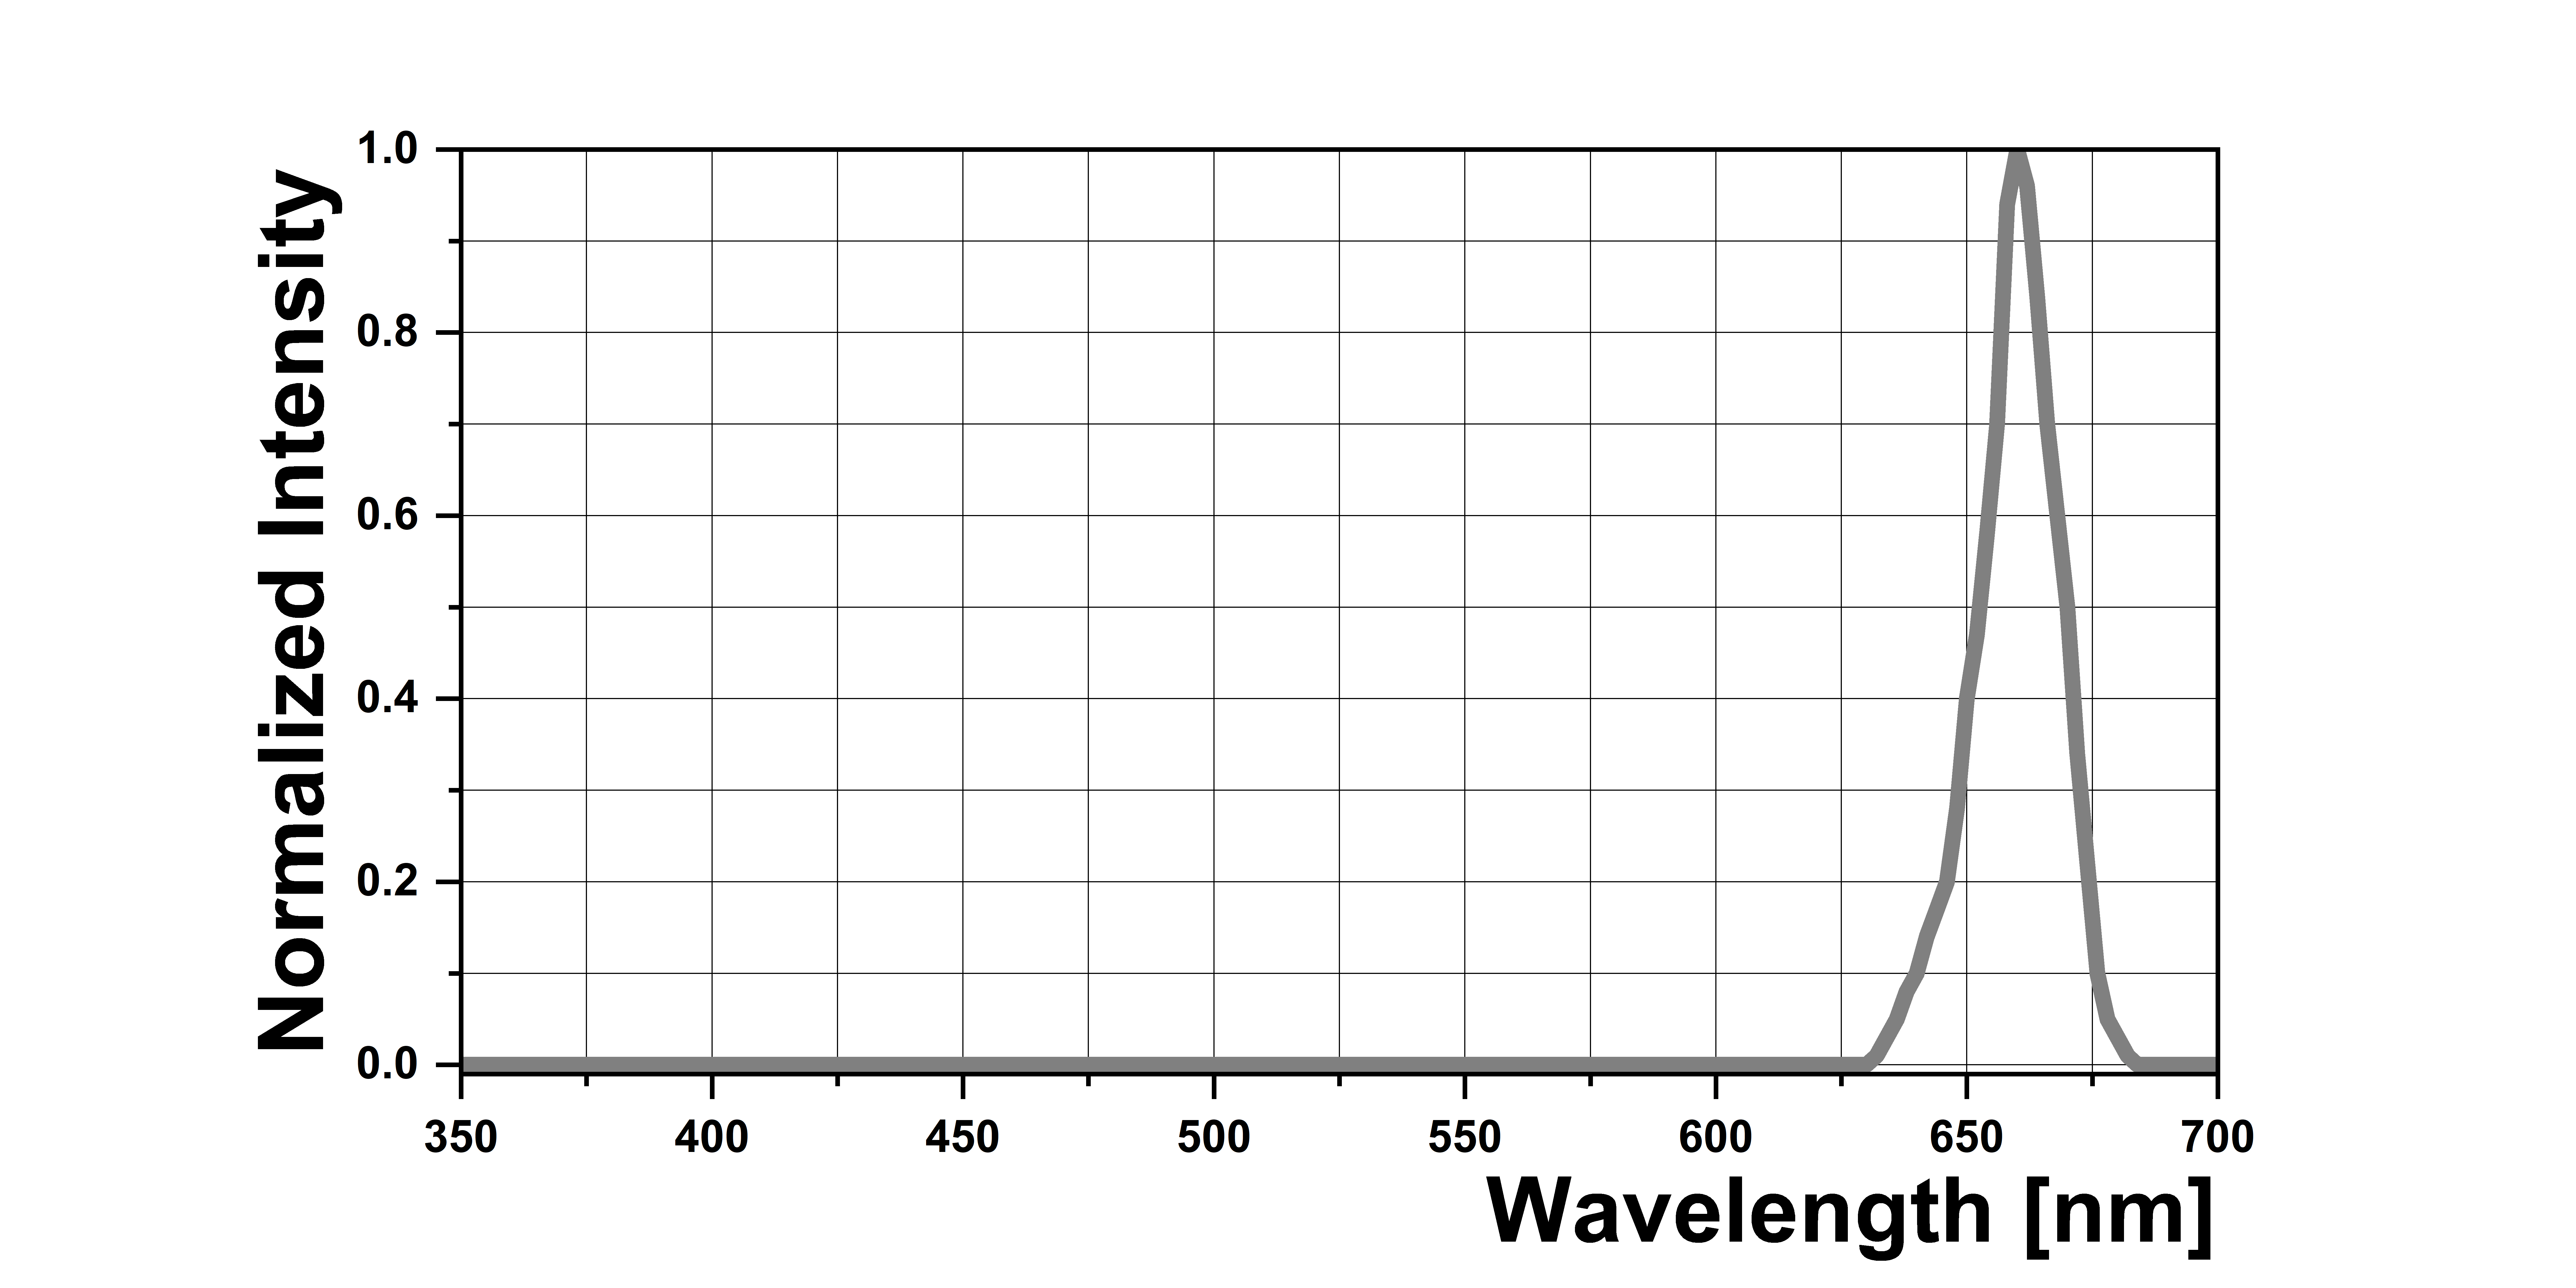

Supplement: s1 [file s1 › fig S2.jpg]

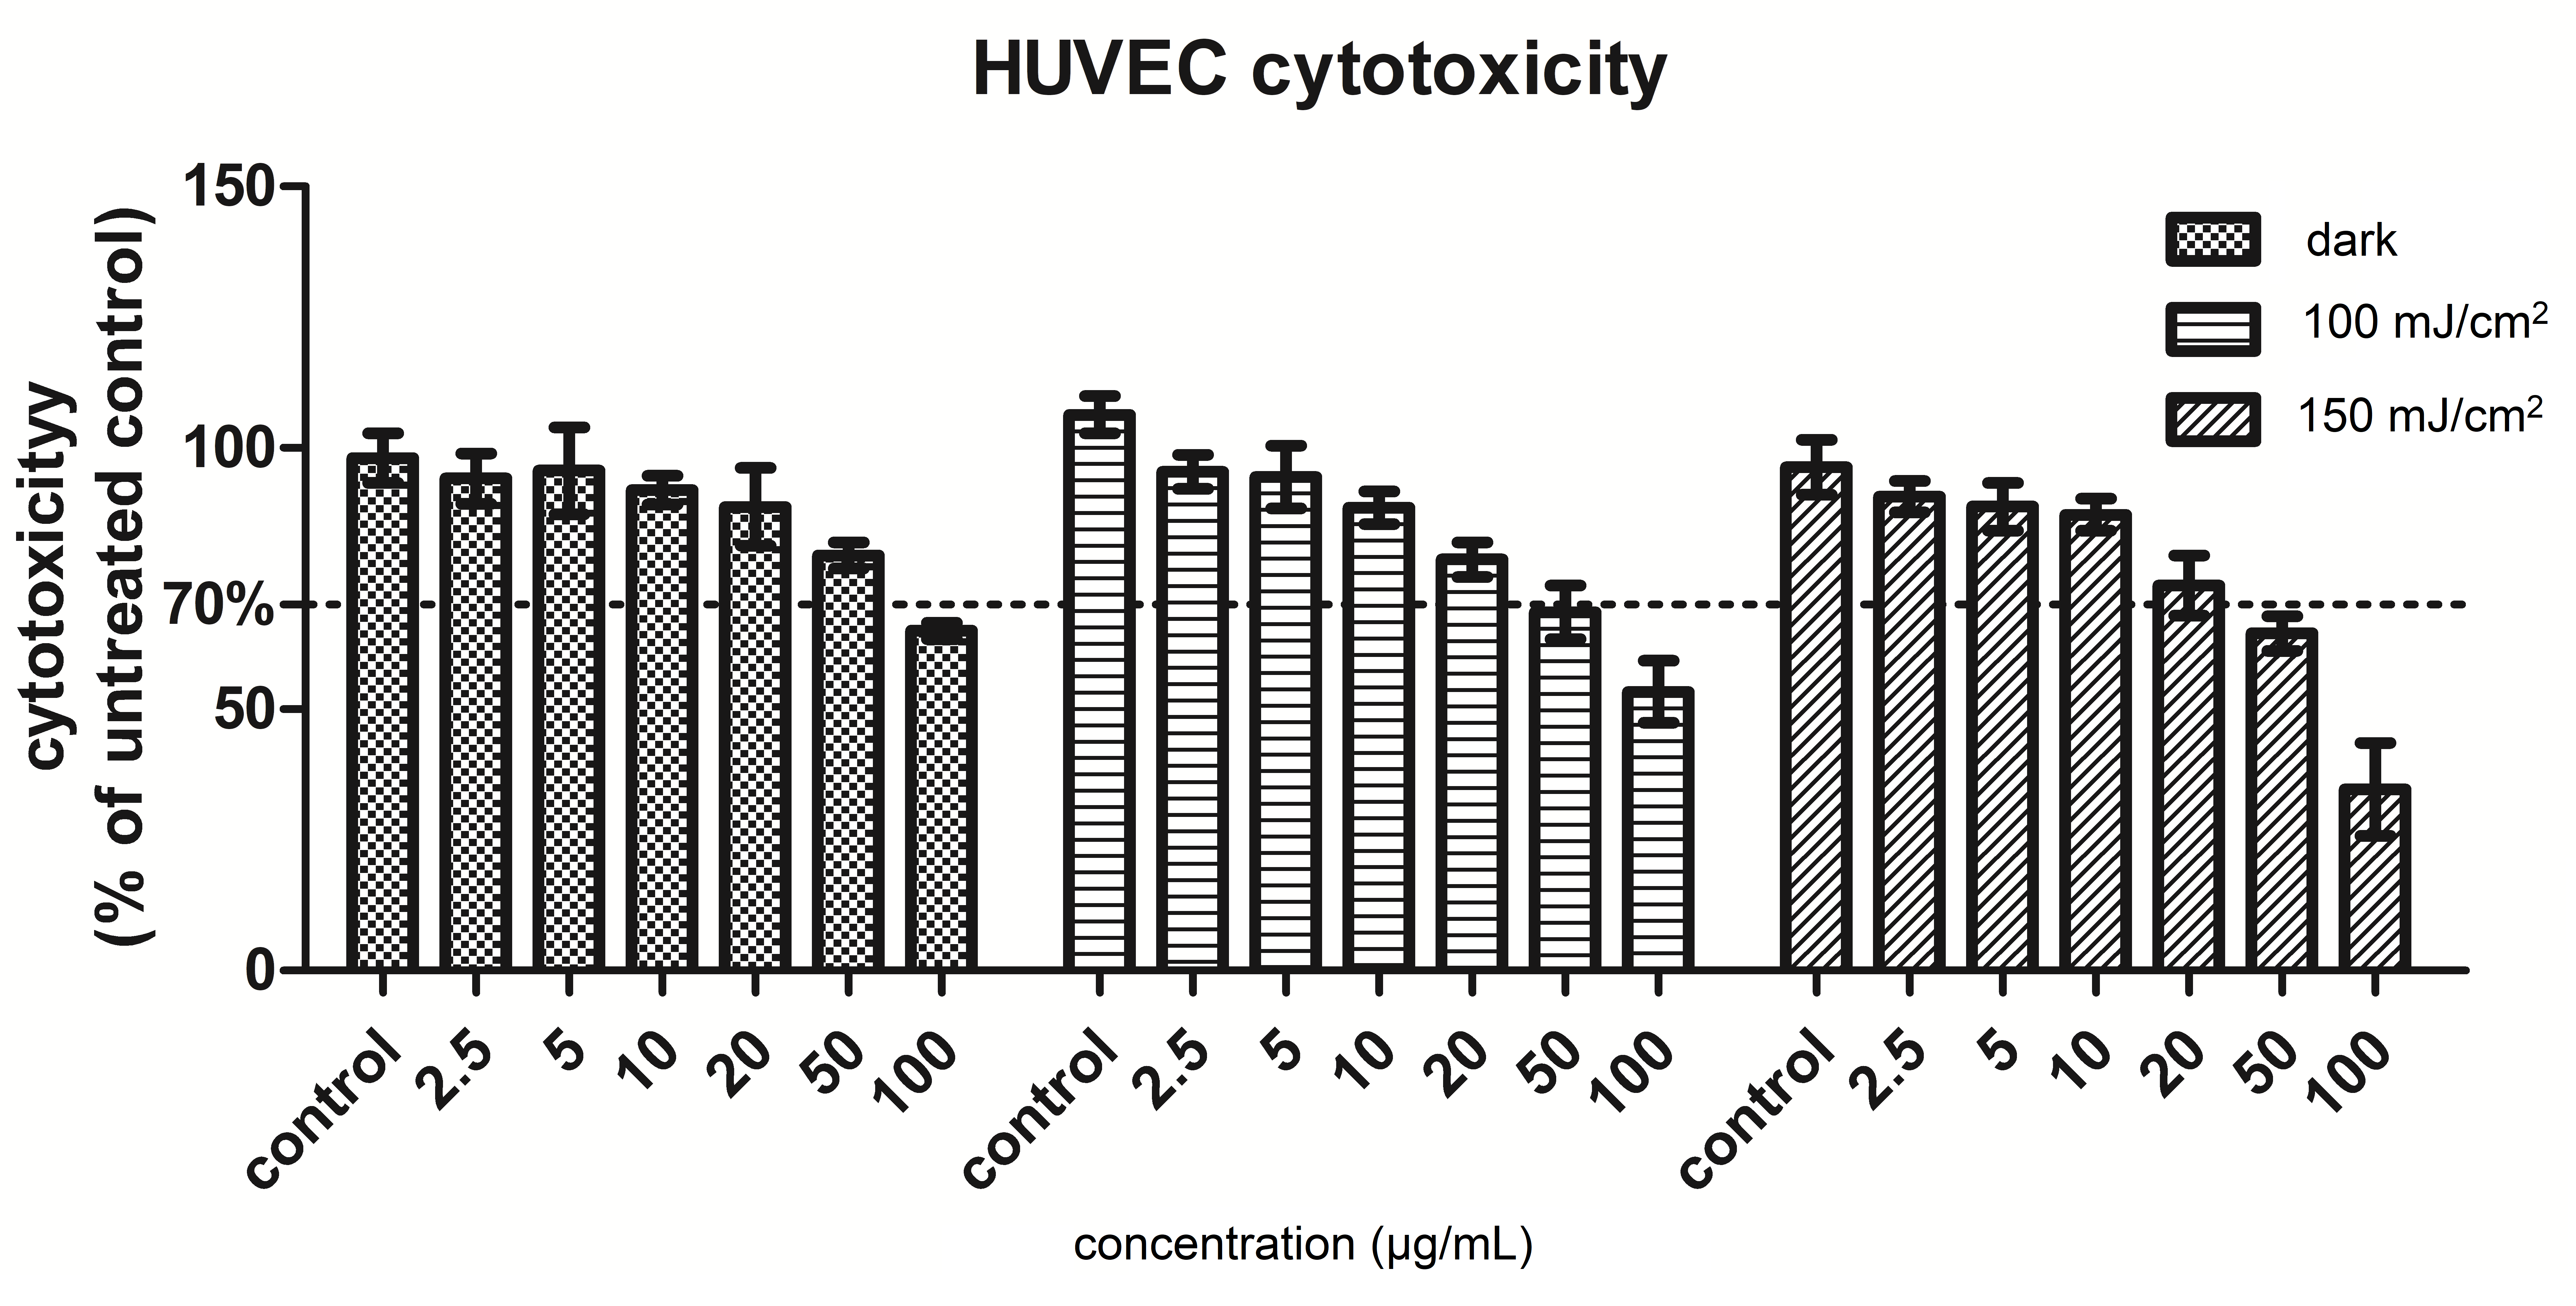

Supplement: s1 [file s1 › fig S3.tif]

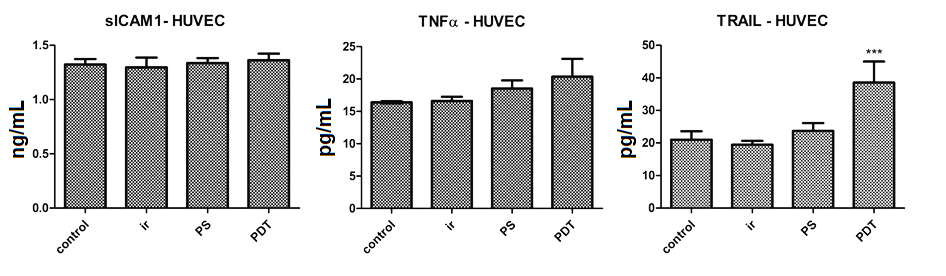

Supplement: s1 [file s1 › fig S4.tif]
